# Supplementary material for: Regulatory Effects of Fyn on Trophoblast Cell Behaviors and Function
Source: Hindawi journal article supplement (doi:10.1155/2022/6006981), 2022-01-01

**A****Fyn****negative control****CON**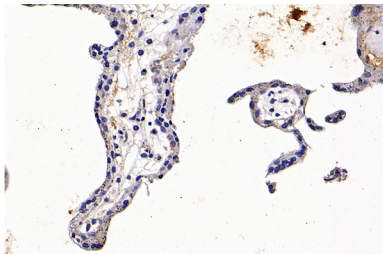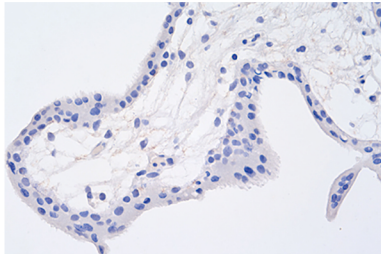**HM**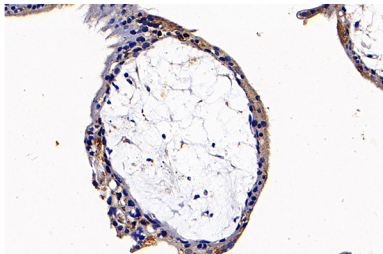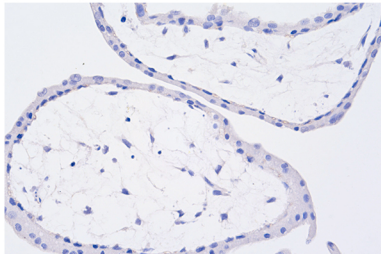**B**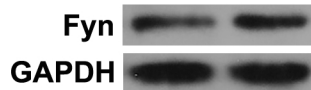**relative Fyn protein level**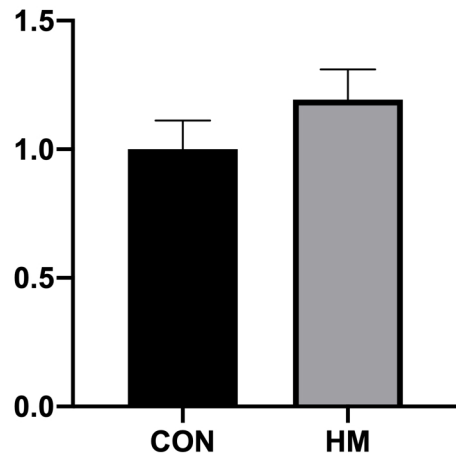

Supplement: f1 [file 6006981.f1.pdf]
